# Supplementary material for: LRR Conservation Mapping to Predict Functional Sites within Protein Leucine-Rich Repeat Domains
Source: PLoS One. 2011 Jul 18;6(7):e21614. doi: 10.1371/journal.pone.0021614 (PMC3138743; doi:10.1371/journal.pone.0021614)

## FSHR

Grey: Interaction with FSH (PDB ID 1XWD)

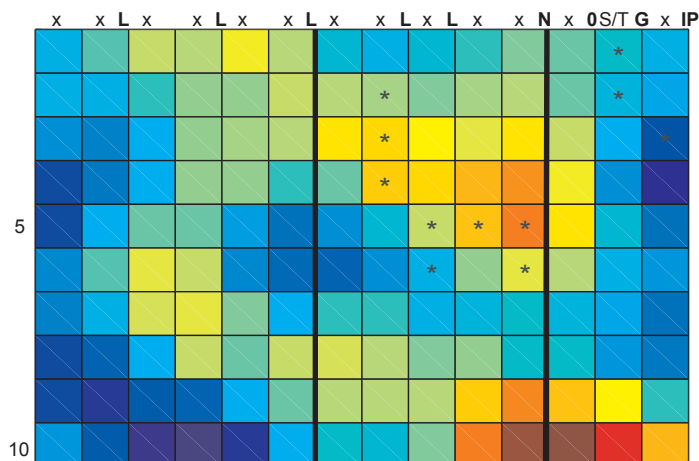

## Glycoprotein 1b alpha

Grey: Interaction with Thrombin (PDB IDs 100K, 18PV)

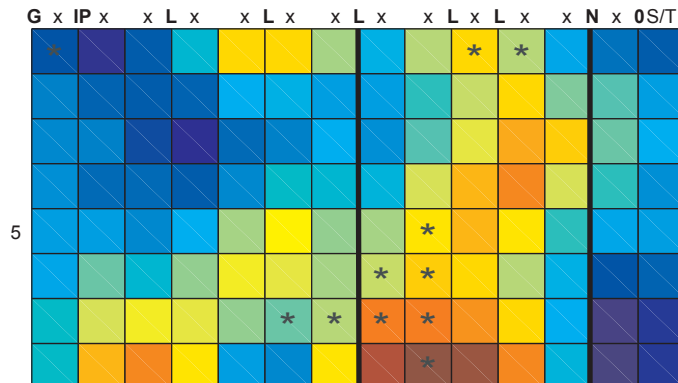

## Sklp2

Grey: Interaction with ligand (p27 and/or Cks1) (PDB ID 2AST)

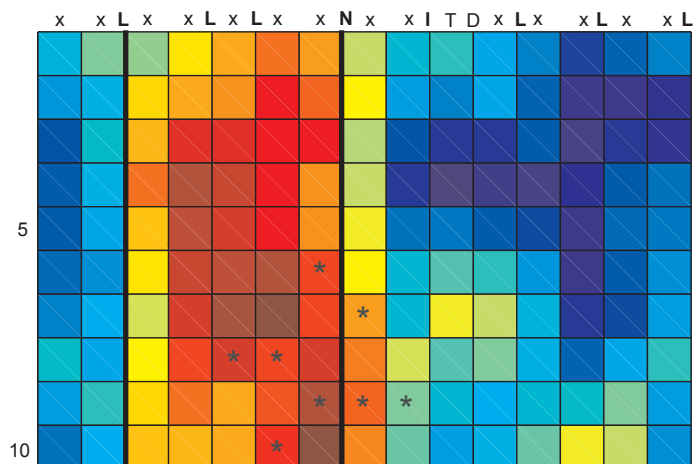

## Slit

Asterisks: Interaction with Robo (PDB ID 2V9T)

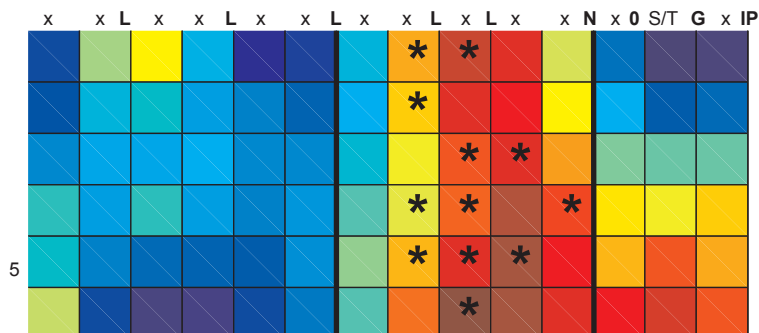

**Figure S1: Additional RCM maps for LRR domains for which there are solved LRR+ligand structures.** For all maps, each row represents a single repeat of the LRR, with each colored box representing a solvent exposed (non-consensus) amino acid position. Each column corresponds to a position within the LRR consensus sequence, as denoted at the top of each map. The color in each box reports the center-weighted regional conservation score for the 5x5 set of boxes that centers on that box (see text for details); red indicates the most conserved regions and blue indicates the most divergent regions (see scale bar in Fig. 1). Bold black vertical lines delineate the five residues in each row that comprise the  $\beta$ -strand,  $\beta$ -turn region (the convex face of the LRR domain). The asterisks were added after RCM and indicate amino acid positions that are LRR-ligand contact points in solved crystal structures.

Figure S1, page 2 of 3

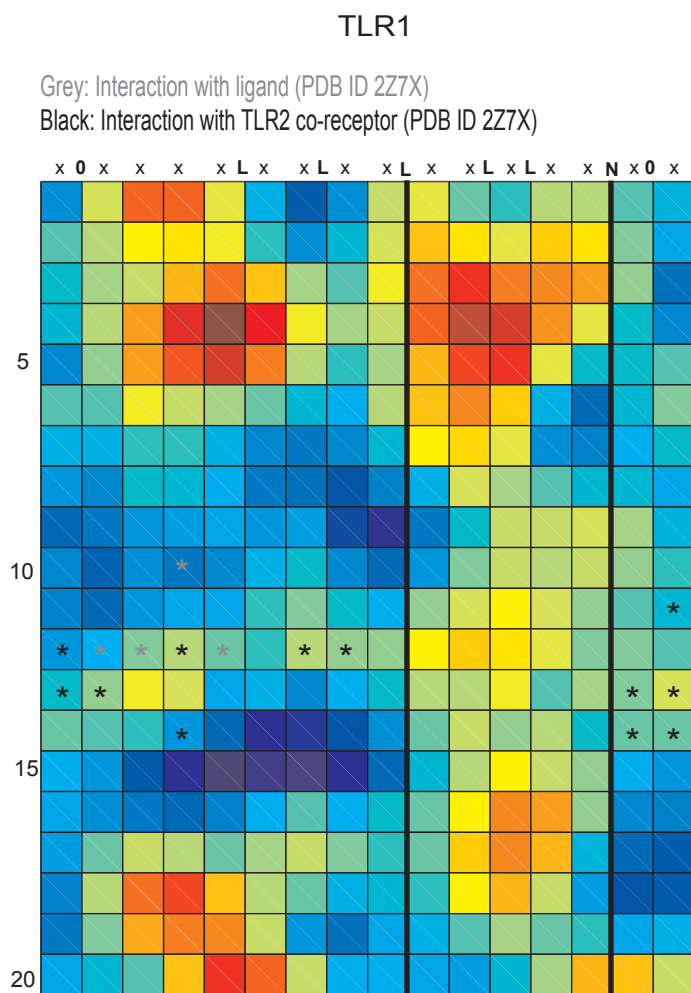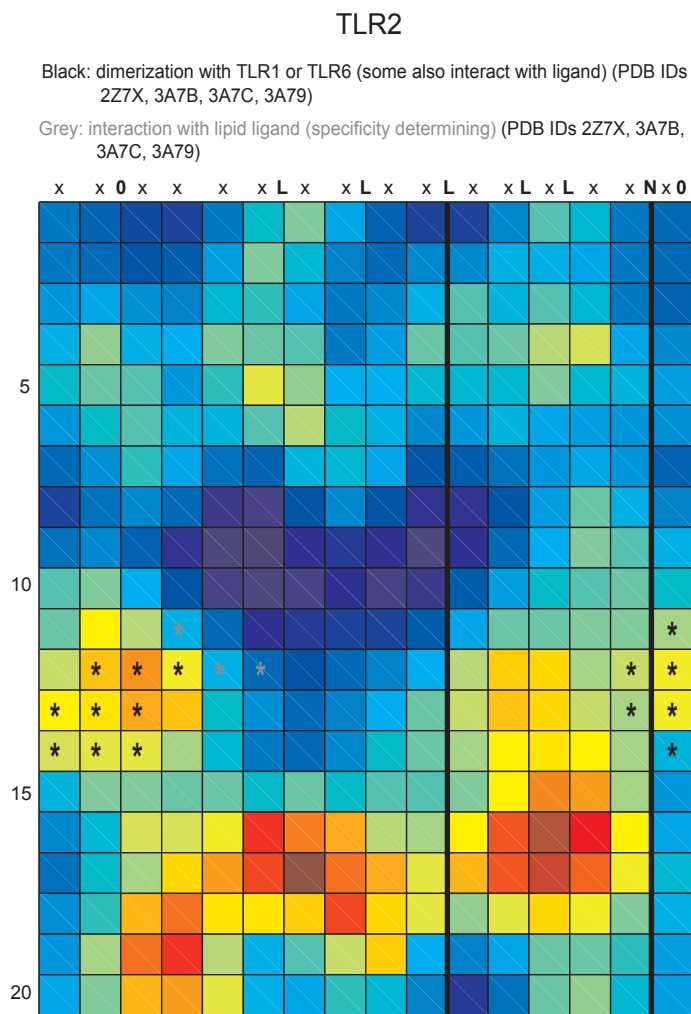

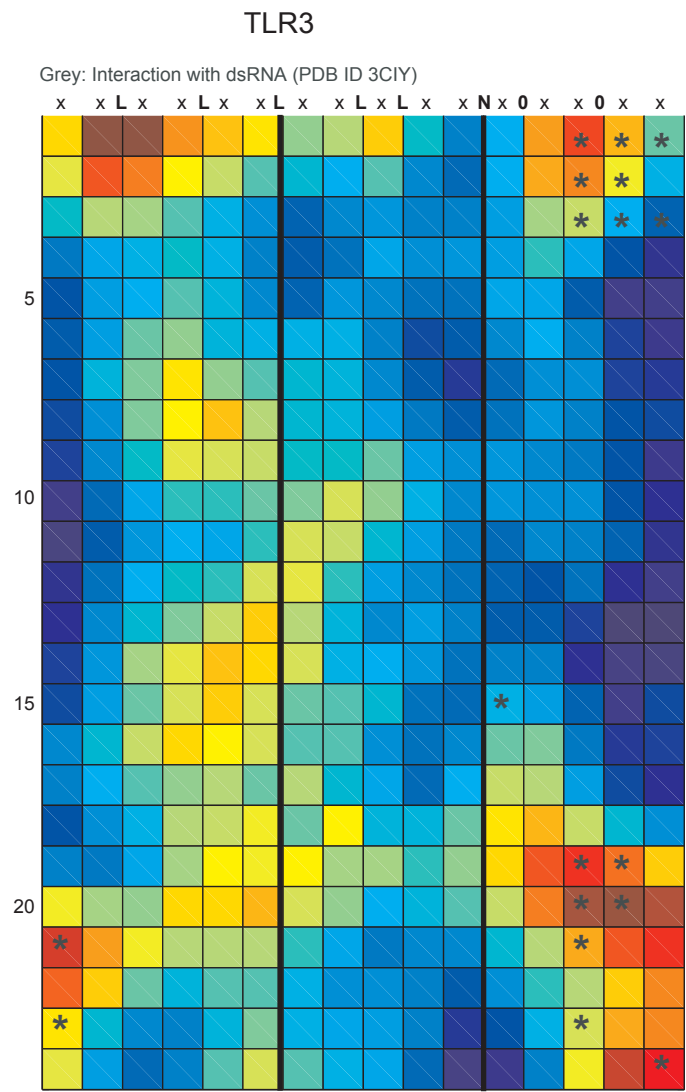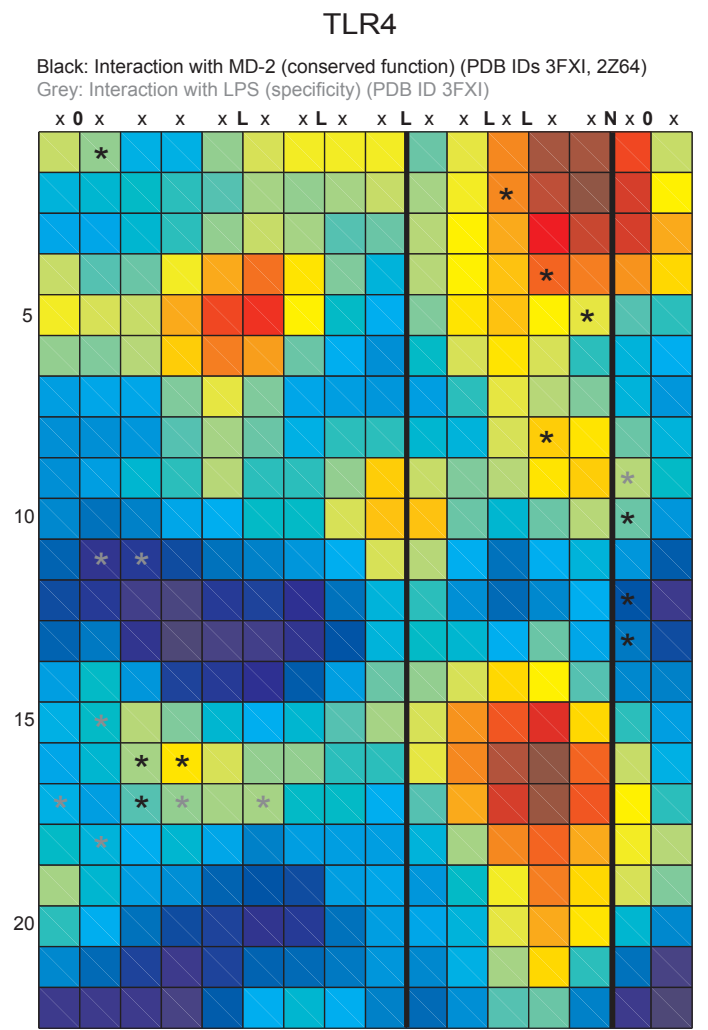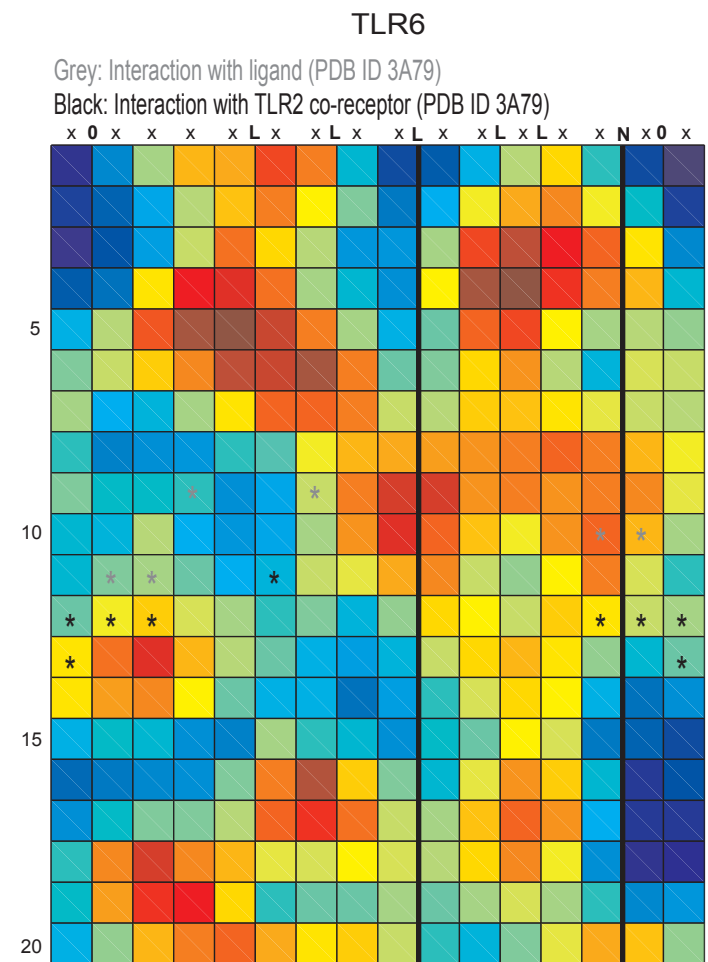

Supplement: Figure S1 — Additional RCM maps for LRR domains for which there are solved LRR+ligand structures. (PDF) [file pone.0021614.s001.pdf]
