# Supplementary material for: LRR Conservation Mapping to Predict Functional Sites within Protein Leucine-Rich Repeat Domains
Source: PubMed Central journal article supplement (PMC3138743; doi:10.1371/journal.pone.0021614), 2011-07-18
Supplement: pone.0021614.s002.pdf [file pone.0021614.s002.pdf]

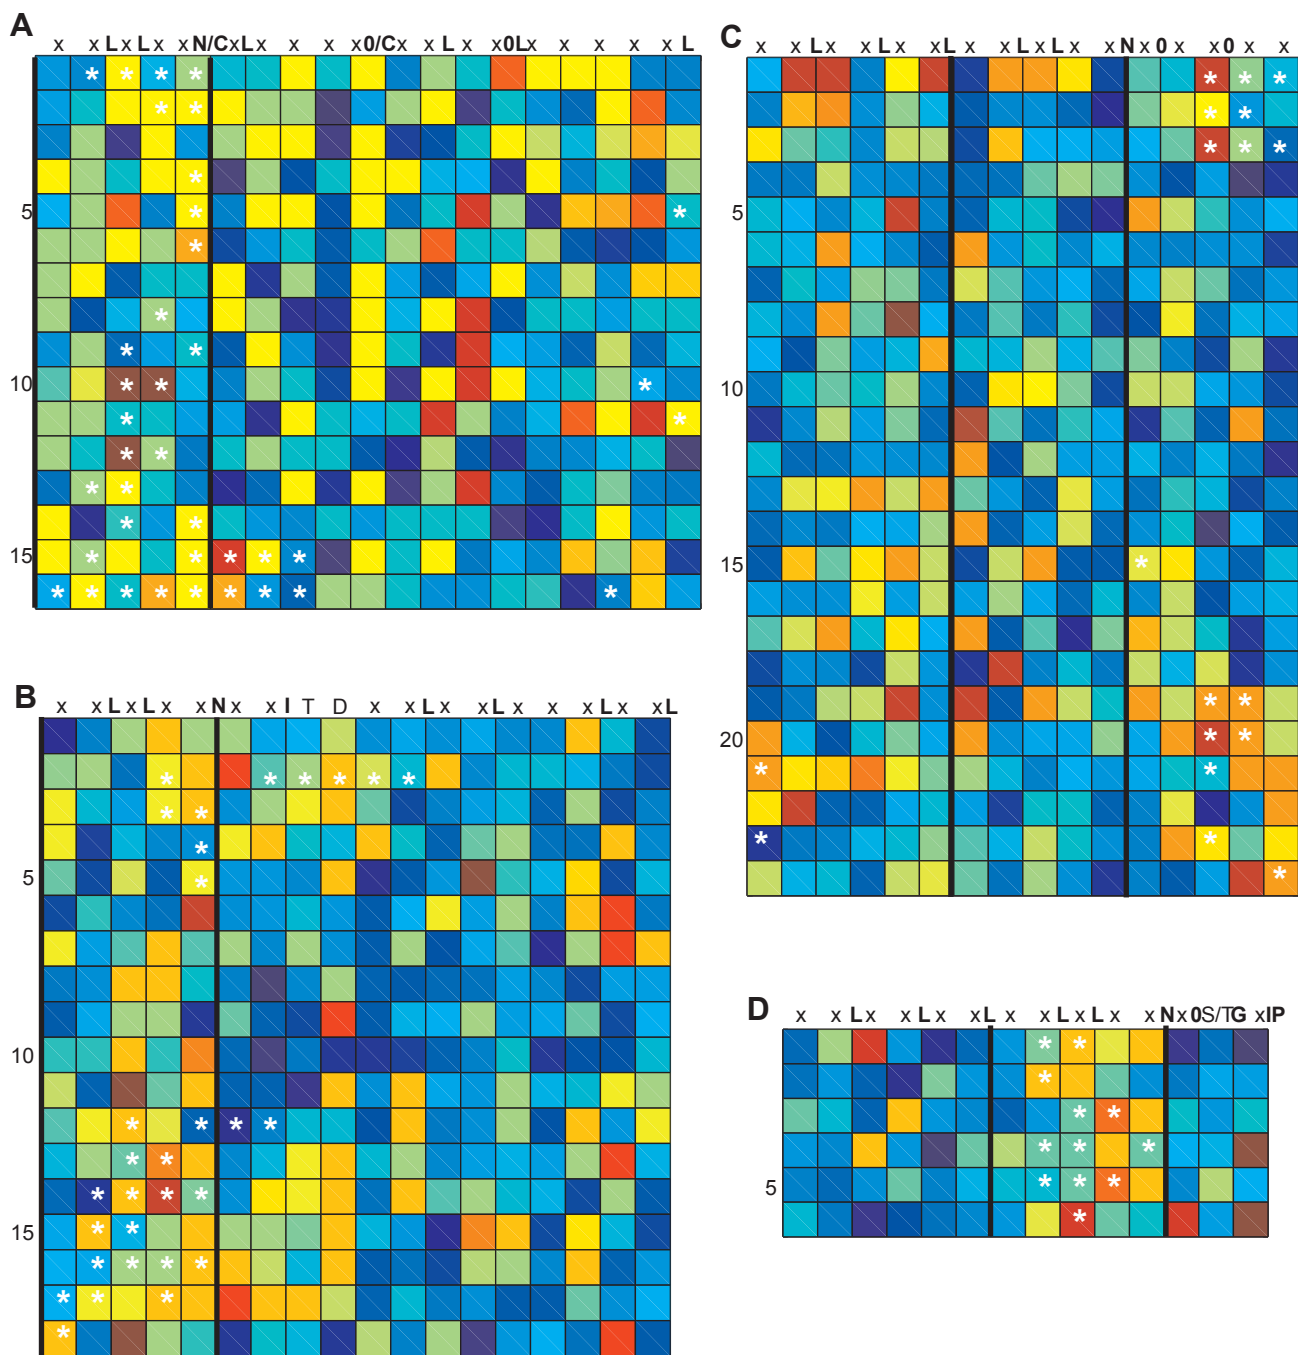

**Figure S2: Maps of individual residue conservation scores, at an intermediate step in RCM prior to calculation of regional conservation scores.** The residue conservation score diagrams in this figure (which are not full RCM maps) were made using the input data used for the RCM maps in Figures 2 and S1, for A) ribonuclease inhibitor, B) auxin receptor (TIR1 and AFB1-5), C) TLR3, and D) slit.
