# Supplementary material for: LRR Conservation Mapping to Predict Functional Sites within Protein Leucine-Rich Repeat Domains
Source: PubMed Central journal article supplement (PMC3138743; doi:10.1371/journal.pone.0021614), 2011-07-18
Supplement: pone.0021614.s004.pdf [file pone.0021614.s004.pdf]

**A**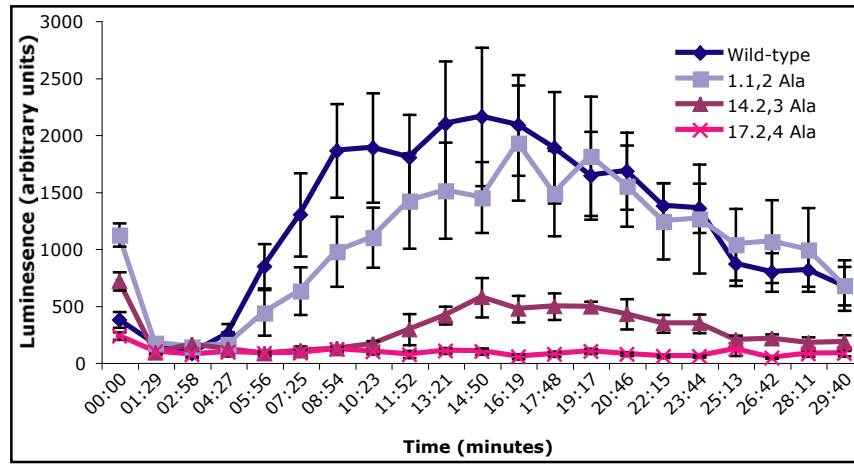**B**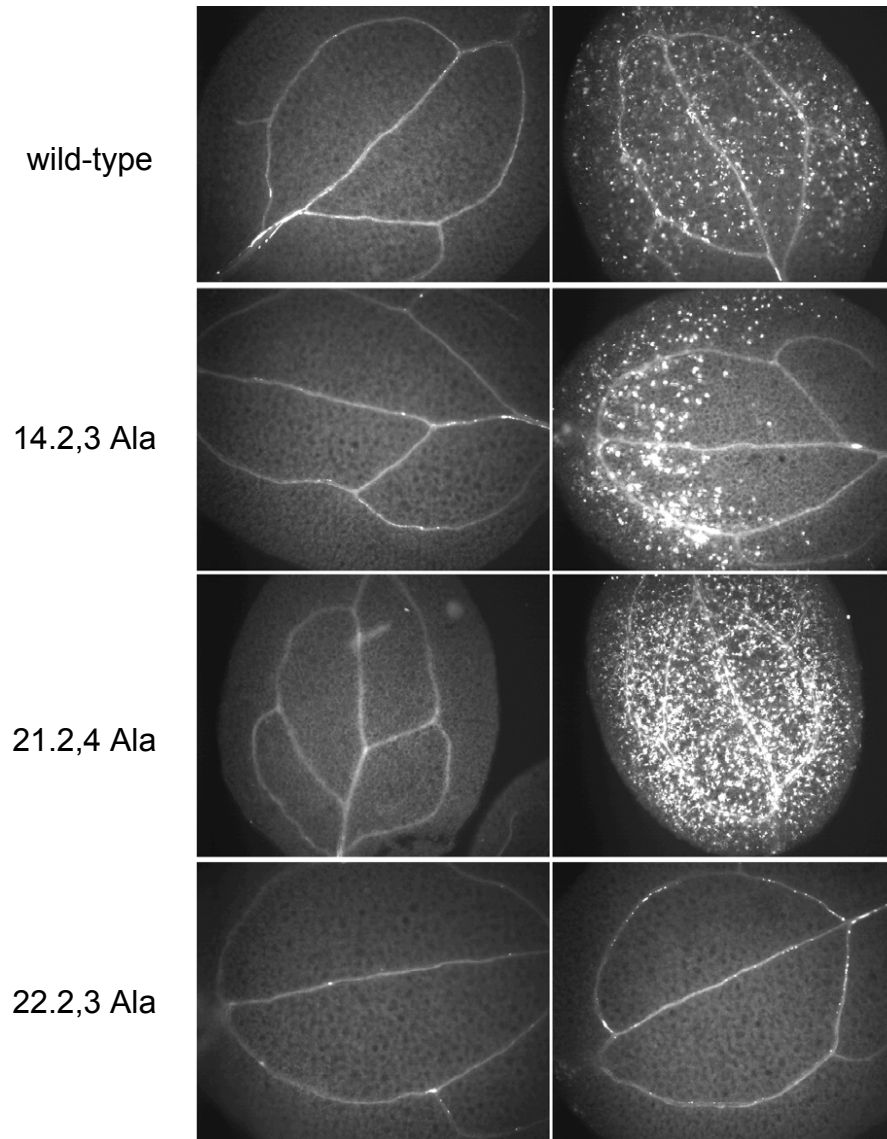

**Figure S4: Examples of ROS and callose assays of EFR double-alanine mutant alleles expressed under control of native EFR promoter in transgenic *Arabidopsis* T1 seedlings.**
