# Supplementary material for: LRR Conservation Mapping to Predict Functional Sites within Protein Leucine-Rich Repeat Domains
Source: PubMed Central journal article supplement (PMC3138743; doi:10.1371/journal.pone.0021614), 2011-07-18
Supplement: pone.0021614.s005.pdf [file pone.0021614.s005.pdf]

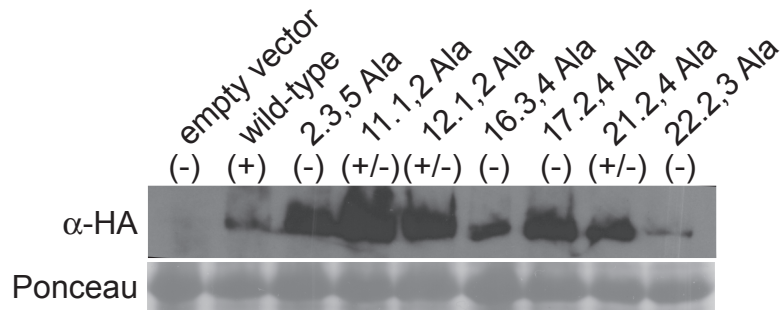

| construct    | mutated amino acids | seedling growth inhibition | reactive oxygen species | callose |
|--------------|---------------------|----------------------------|-------------------------|---------|
| wild-type    | N/A                 | ++                         | ++                      | ++      |
| empty vector | N/A                 | -                          | -                       | -       |
| 1.1,2 Ala    | I76, S77            | ++                         | ++                      | ++      |
| 1.4,5 Ala    | G81, G82            | ++                         | ++                      | ++      |
| 2.3,5 Ala    | N103, D106          | -                          | -                       | -       |
| 9.4,5 Ala    | G274, T275          | ++                         | ++                      | ++      |
| 10.1,2 Ala   | E293, R294          | ++                         | ++                      | +       |
| 10.4,5 Ala   | S298, S299          | ++                         | ++                      | ++      |
| 11.1,2 Ala   | W317, W318          | +                          | +                       | +       |
| 12.1,2 Ala   | E347, W348          | +                          | +                       | ++      |
| 13.2,3 Ala   | S373, F375          | ++                         | ++                      | ++      |
| 14.2,3 Ala   | E397, S399          | +                          | +                       | +       |
| 16.3,4 Ala   | H447, N449          | -                          | -                       | -       |
| 17.2,4 Ala   | D469, D473          | -                          | -                       | -       |
| 21.2,4 Ala   | N564, S568          | +                          | +                       | ++      |
| 22.2,3 Ala   | N588, N590          | -                          | -                       | -       |

**Figure S5: Presence of EFR-HA double-alanine mutant proteins, whether functional or not, in transgenic *Arabidopsis* seedlings.** Gel lanes were equally loaded for total protein, as confirmed by Ponceau stain, and detected using anti-HA on Western blots after SDS-PAGE. A table is also presented, summarizing results with these mutant alleles.
